# Supplementary material for: Circulating Biomarkers of Gut Barrier Function: Correlates and Nonresponse to Calcium Supplementation among Colon Adenoma Patients
Source: Oxford University Press journal article supplement (doi:10.1158/1055-9965.epi-15-0488), 2015-12-16
Supplement: 10559965epi150488-sup-148957_3_table_3226849_nxqdnj.docx [file 10559965epi150488-sup-148957_3_table_3226849_nxqdnj.docx]

Supplementary Table 1. Pearson correlation coefficients (r) for correlations between plasma concentrations of flagellin- and LPS-specific immunoglobulins IgA and IgG a

|  | Flagellin-IgA | |  | Flagellin-IgG | |  | LPS-IgA | |  | LPS-IgG | |
| --- | --- | --- | --- | --- | --- | --- | --- | --- | --- | --- | --- |
|  | Men | Women |  | Men | Women |  | Men | Women |  | Men | Women |
| Flagellin-IgA |  |  |  | 0.45 | 0.41 |  | 0.67 | 0.80 |  | 0.20 | 0.37 |
| Flagellin-IgG |  |  |  |  |  |  | 0.31 | 0.43 |  | 0.30 | 0.46 |
| LPS-IgA |  |  |  |  |  |  |  |  |  | 0.28 | 0.55 |
| LPS-IgG |  |  |  |  |  |  |  |  |  |  |  |

Abbreviations: Ig, immunoglobulin; LPS, lipopolysaccharide

a p value < 0.05 for all correlations
